# Supplementary material
Source: Springer Nature journal article supplement (https://www.springermedizin.de/resource/supplementary/12936_2008_722_MOESM3_ESM.pdf/9548088)

### GST activity

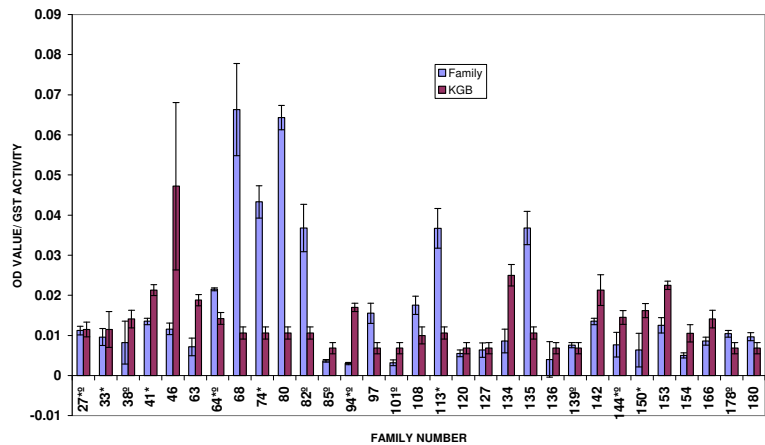

### monooxygenase activity

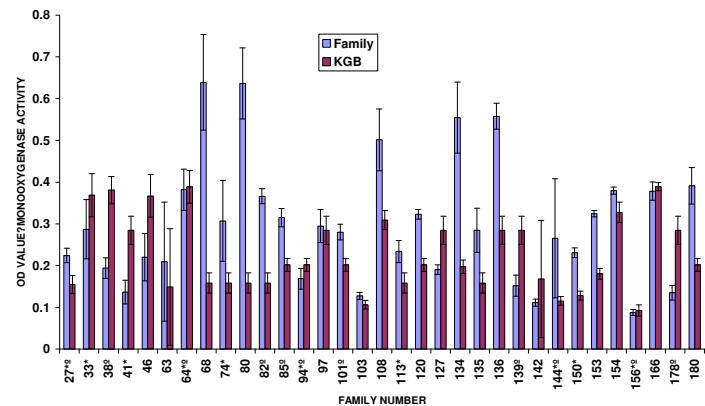

### General esterase activity using alpha naphthyl acetate esterase as a substrate

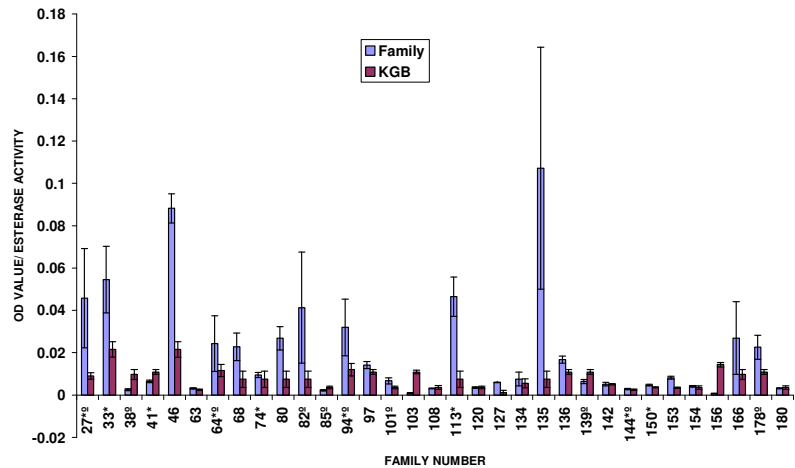

### Generak esterase activity using beta naphthyl acetate as a substrate

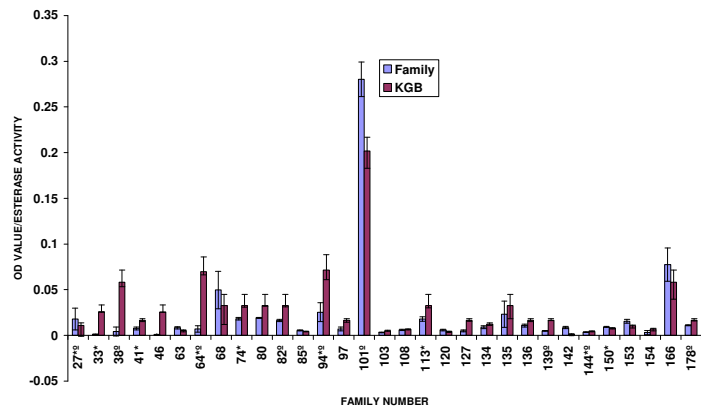

Supplement: MOESM3 [file 9548088]
